# Supplementary material for: Mutations in PIK3C2A cause syndromic short stature, skeletal abnormalities, and cataracts associated with ciliary dysfunction
Source: PLoS Genet. 2019 Apr 29;15(4):e1008088. doi: 10.1371/journal.pgen.1008088 (PMC6508738; doi:10.1371/journal.pgen.1008088)
Supplement: S4 Table — (XLSX) [file pgen.1008088.s008.xlsx]

## Sheet: Sheet1
Table S4. List of primers used in this study.
Primer	Forward	Reverse	Function
PIK3C2A Exon3	GACATTGAAGGATTTCAGCTACC		Splicing-effect
PIK3C2A Exon10		GCACAGTCTGTAGGACTCCTACC	Splicing-effect
PIK3C2A Exon4	TTGCTGGGTACATGATGACTTG		Splicing-effect
PIK3C2A Exon8		TTGGAAGATTAACTGCTCTCTTTAGC	Splicing-effect
PIK3C2A	CTCAGCTTGCAAAAGCCCAG	CTGGGTTTGTGCGGTGATTG	Gene expression
PIK3C2B	TGTTTGGCAACATCAAGCGG	AATCATGGAAGCGGCTGGAA	Gene expression
PIK3C2G	AAACATTCATCTCCCAGATGGC	GTGGGACACTACAGAGTCGG	Gene expression
GAPDH	AATCCCATCACCATCTTCCA	TGGACTCCACGACGTACTCA	Gene expression
PIK3C2A	ACAGTGGCCACCTGGATTAC	TCAGTCCTTGCTTTCCCATT	Sequencing, Family I
PIK3C2A	TTATTGTGGCTGAAGGATGC	GACAATAGAAAGACCAAAGAGTGG	Sequencing, Family III
