# Supplementary material for: Mutations in PIK3C2A cause syndromic short stature, skeletal abnormalities, and cataracts associated with ciliary dysfunction
Source: PLoS Genet. 2019 Apr 29;15(4):e1008088. doi: 10.1371/journal.pgen.1008088 (PMC6508738; doi:10.1371/journal.pgen.1008088)
Supplement: S5 Table — (XLSX) [file pgen.1008088.s009.xlsx]

## Sheet: Sheet1
Table S5. List of antibodies used in this study.
Antigen	Host	Catalog #	Source	Dilution IF	Dilution IB
PIK3C2A (AB1)	rabbit	--	Generated by V. Haucke, epitope: a.a. 2-365	1:200	1:1,000
PIK3C2A (AB2)	mouse	Sc-365290	Santa Cruz, epitope: a.a. 61-360	1:50	1:1,000
PIK3C2A (AB3)	rabbit	12402	Cell Signaling, epitope: ~ a.a. 717	--	1:1,000
PIK3C2A (AB4)	Rabbit	22028-1-AP	ProteinTech, epitope: a.a. 1-338	--	1:1,000
PIK3C2B	mouse	611342	BD Biosciences	--	1:1,000
Acetylated α-Tubulin (Lys40)	mouse	T7451	Sigma	1:300	--
Acetylated α-Tubulin (Lys40)	rabbit	5335	Cell Signaling	1:200	--
IFT88	rabbit	13967-1-AP	ProteinTech	1:50	--
PI(3,4)P2	mouse	Z-P034b	Echelon	1:150	--
PI(3)P	mouse	Z-P003	Echelon	1:100	--
RAB11A	rabbit	Ab65200	Abcam	1:100	--
Centrin	mouse	04-1624	Millipore	1:500	--
ARL13B	rabbit	17711-1-AP	Proteintech	1:500	--
GAPDH	mouse	MA5-15738	Thermo Fisher	--	1:10,000
IF, immunofluorescence; IB, immunoblot; a.a., amino acid
